# Supplementary material for: Microstructural transition of poly(vinyl alcohol)-based aerogels in the presence of interpolymer complexes
Source: Royal Society of Chemistry journal article supplement (doi:10.1039/d1nj04646b), 2021-11-18
Supplement: d1nj04646b1.pdf [file d1nj04646b1.pdf]

## Electronic Supplementary Information for Microstructural Transition of Poly (vinyl alcohol)-based Aerogels in the Present of Interpolymer Complexes

Chao Wang, Guolong Sang, Minghao Yang, Ge He, Yedong Rong and Jinlong Yang\*

*State Key Lab of New Ceramics and Fine processing, School of Materials Science and Engineering,*

*Tsinghua University, Beijing 100084, China.*

E-mail: jlyang@mail.tsinghua.edu.cn

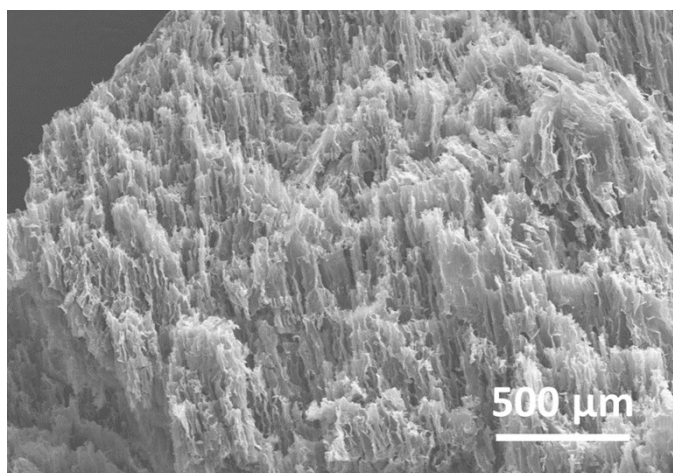

**Figure S1** SEM image of C60 sample. The unidirectional stripe structure were easy to be recognized.

| entry    | E20  | E40  | E60  | E80  | A20  | A40  | A60  | A80  | C20  | C40  | C60  | C80  |
|----------|------|------|------|------|------|------|------|------|------|------|------|------|
| pH value | 5.41 | 4.57 | 3.85 | 3.34 | 4.01 | 3.54 | 3.28 | 3.16 | 9.52 | 9.63 | 9.67 | 9.81 |

**Table S1** pH value of the precursor solutions of the PVA-based aerogels.

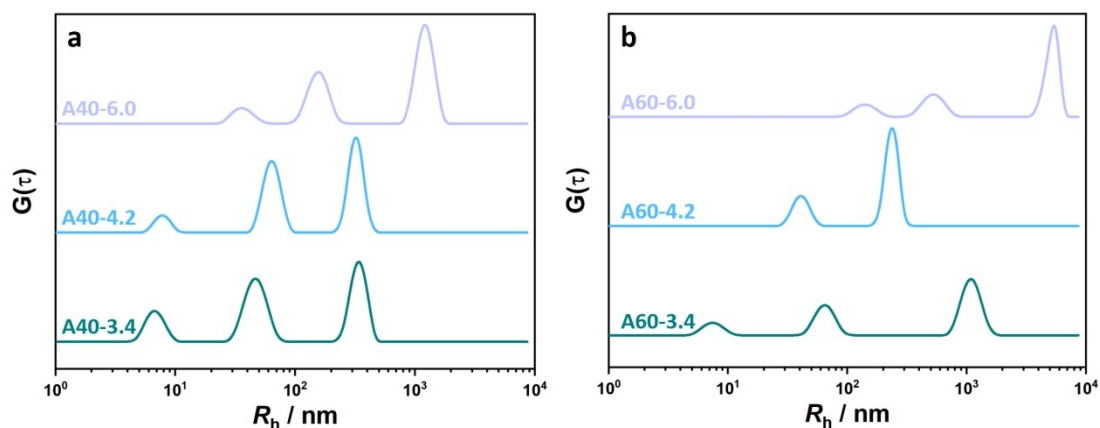

Figure S2 DLS data of A40 and A60 samples with different pH values.

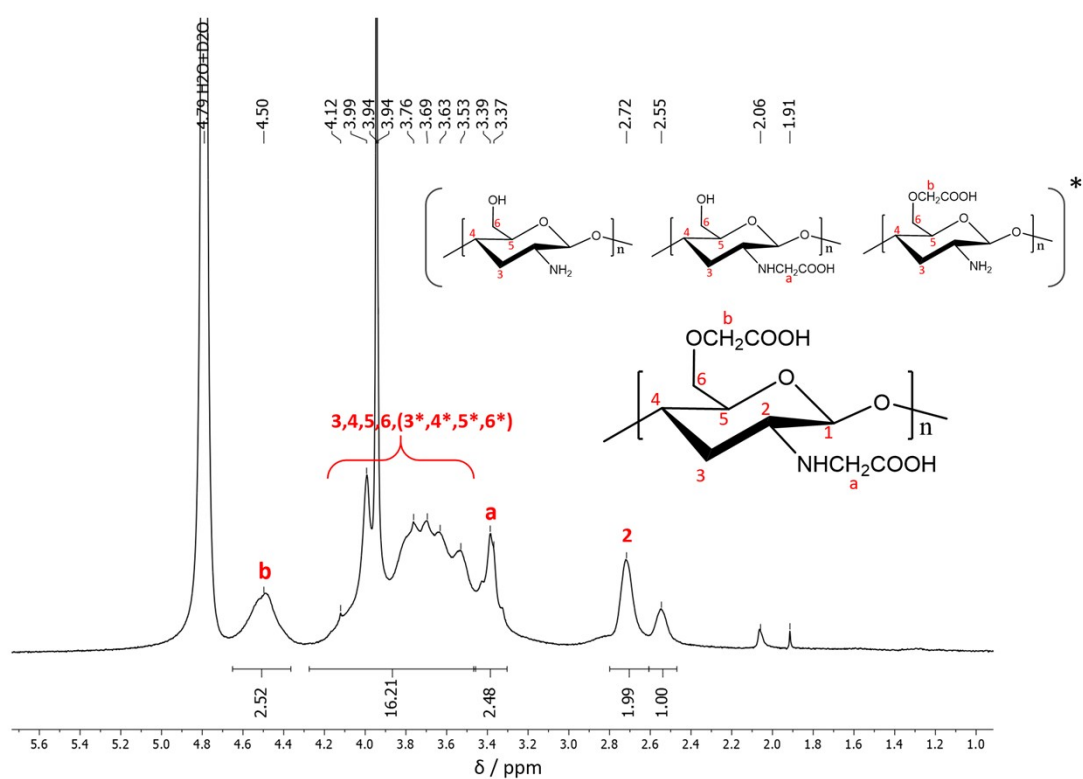

Figure S3  $^1\text{H}$ NMR of carboxymethyl chitosan. The peaks and corresponding structure were labeled on the graph.

### Calculation of the degree of substitution (DS)

The average DS of CM-CTS was calculated as follow:

$$\text{DS} = \frac{(I_a + I_b) / 2}{(I_* + I_3 + I_4 + I_5 + I_6) / 6} * 100\% = \frac{(2.48 + 2.52) / 2}{16.21 / 6} * 100\% = 92.4\%$$

The ratio of N-carboxymethyl and O-carboxymethyl was almost 1:1 as the integral suggested.
